# Supplementary material for: Simulation of Magnetophoretic Separation Processes in Dispersions of Superparamagnetic Nanoparticles in the Noncooperative Regime
Source: Hindawi journal article supplement (doi:10.1155/2012/678581), 2012-01-01
Supplement: f1 [file 678581.f1.zip]

Archive with 4 entries (2 files):
- 678581.f1/
- 678581.f1/dmovie_03_FF050LX200.mp4
- 678581.f1/__MACOSX/
- 678581.f1/__MACOSX/._dmovie_03_FF050LX200.mp4
