# Supplementary material for: Simulation of Magnetophoretic Separation Processes in Dispersions of Superparamagnetic Nanoparticles in the Noncooperative Regime
Source: Hindawi journal article supplement (doi:10.1155/2012/678581), 2012-01-01
Supplement: f2 [file 678581.f2.zip]

Archive with 2 entries (1 files):
- 678581.f2/
- 678581.f2/movie.g30.960x516.mp4
